# Supplementary material for: Chromosomally Unstable Gastric Cancers Overexpressing Claudin-6 Disclose Cross-Talk between HNF1A and HNF4A, and Upregulated Cholesterol Metabolism
Source: MDPI journal article supplement (doi:10.3390/ijms232213977), 2022-11-12
Supplement: s1 [file s1]

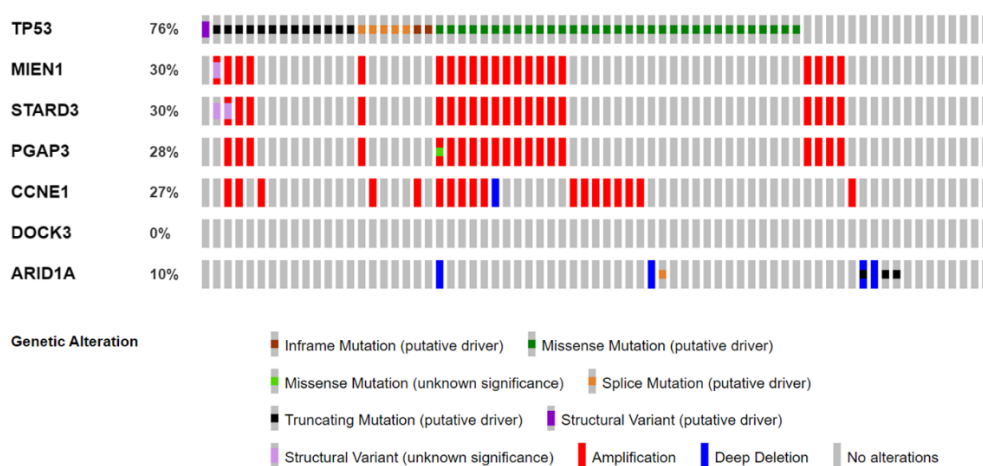

Figure S1- Oncoprint of genomic copy number alterations and mutations in Cldn-6<sup>high</sup> gastric tumors.

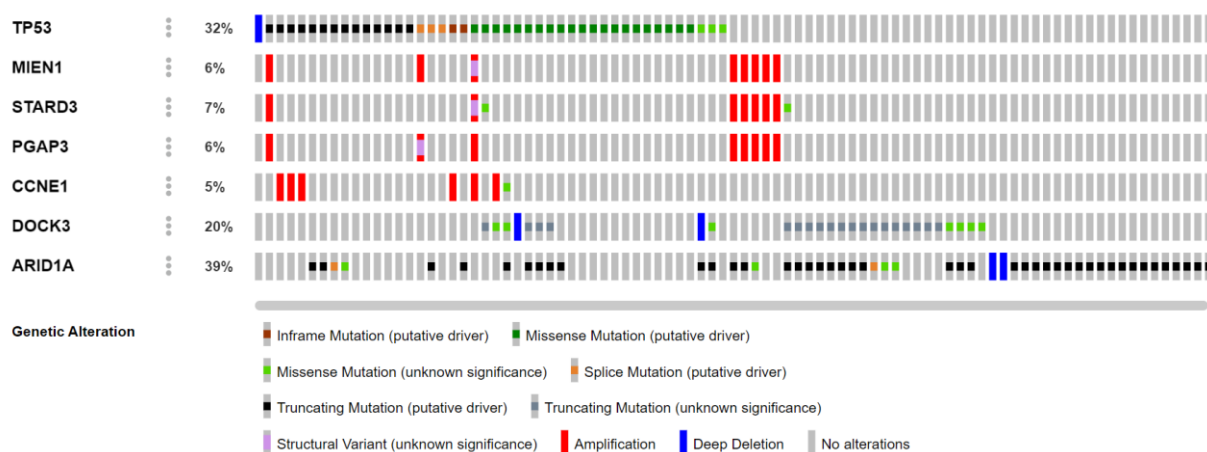

Figure S2 - Oncoprint of genomic copy number alterations and mutations in Cldn-6<sup>low</sup> gastric tumors.
